# Supplementary material for: Comparative Study of the Yield and Chemical Profile of Rose Oils and Hydrosols Obtained by Industrial Plantations of Oil-Bearing Roses in Bulgaria
Source: MDPI journal article supplement (doi:10.3390/resources12070083), 2023-07-10
Supplement: s1 [file s1]

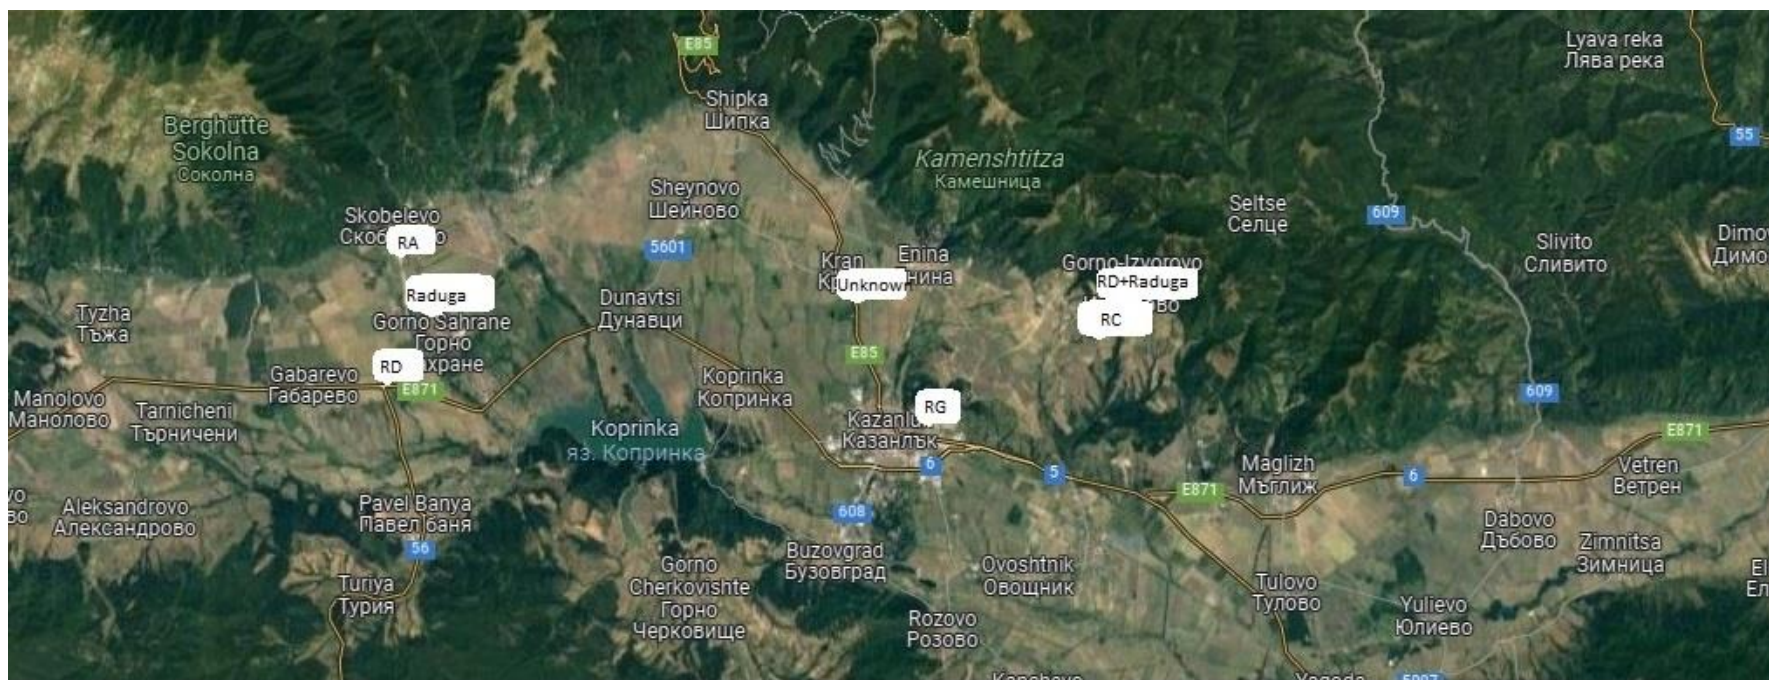

**Figure S1.** Location of the rose plantations in Kazanlak valley.

**Table S1.** Chemical composition of the rose oils from plantations in Kazanlak valley.

| №                             | Compound                            | RI calc.    | RI lit.     | Main and character constituents, Rel. % |                     |                     |                     |                       |                                             |                     |                    |
|-------------------------------|-------------------------------------|-------------|-------------|-----------------------------------------|---------------------|---------------------|---------------------|-----------------------|---------------------------------------------|---------------------|--------------------|
|                               |                                     |             |             | <i>R.damascena</i>                      | <i>R. alba</i>      | <i>R.gallica</i>    | <i>R.centifolia</i> | <i>Rosa</i><br>Raduga | <i>R. damascena</i><br>+ <i>Rosa</i> Raduga | <i>Rosa</i><br>Krun | ISO<br>9842:2003   |
| 1                             | Ethanol                             | 489         | 489         | 0.90 ± 0.07                             | 0.15 ± 0.01         | 0.04 ± 0.00         | tr                  | 0.01 ± 0.00           | 0.10 ± 0.01                                 | tr                  | ≤2.00              |
| 2                             | α-Pinene                            | 939         | 939         | 0.72 ± 0.02                             | 0.01 ± 0.00         | 0.48 ± 0.05         | 0.57 ± 0.02         | 0.23 ± 0.01           | 1.19 ± 0.01                                 | 0.12 ± 0.01         | -                  |
| 3                             | Limonene                            | 1031        | 1033        | 0.06 ± 0.00                             | 0.03 ± 0.00         | 0.17 ± 0.03         | 0.03 ± 0.00         | 0.03 ± 0.00           | 0.11 ± 0.03                                 | 0.04 ± 0.00         | -                  |
| 4                             | Linalool                            | 1097        | 1098        | 2.59 ± 0.01                             | 1.67 ± 0.03         | 1.97 ± 0.05         | 1.17 ± 0.07         | 2.09 ± 0.05           | 0.74 ± 0.01                                 | 0.72 ± 0.02         | -                  |
| 5                             | Phenylethanol                       | 1110        | 1110        | 0.43 ± 0.02                             | 0.25 ± 0.02         | 0.41 ± 0.03         | 0.09 ± 0.01         | 0.22 ± 0.01           | 1.35 ± 0.05                                 | 0.55 ± 0.02         | ≤3.5               |
| 6                             | Cis-Rose oxide                      | 1106        | 1106        | 0.32 ± 0.02                             | 0.08 ± 0.02         | 0.06 ± 0.00         | 0.07 ± 0.00         | 0.01 ± 0.00           | 0.21 ± 0.01                                 | 0.26 ± 0.01         | -                  |
| 7                             | Trans-Rose oxide                    | 1126        | 1126        | 0.14 ± 0.03                             | 0.06 ± 0.00         | 0.01 ± 0.00         | 0.04 ± 0.00         | 0.02 ± 0.00           | 0.11 ± 0.02                                 | 0.13 ± 0.03         | -                  |
| 8                             | <b>Citronellol</b>                  | 1229        | 1228        | <b>28.72 ± 0.75</b>                     | <b>12.21 ± 0.12</b> | <b>7.28 ± 0.20</b>  | <b>6.70 ± 0.72</b>  | <b>8.38 ± 0.92</b>    | <b>20.09 ± 2.50</b>                         | <b>10.21 ± 0.12</b> | <b>20.0 - 34.0</b> |
| 9                             | <b>Nerol</b>                        | 1226        | 1226        | <b>9.34 ± 0.09</b>                      | <b>10.10 ± 0.90</b> | <b>7.01 ± 0.92</b>  | <b>5.80 ± 0.50</b>  | <b>11.90 ± 0.78</b>   | <b>11.01 ± 1.10</b>                         | <b>9.06 ± 0.30</b>  | <b>5.0 - 12.0</b>  |
| 10                            | <b>Geraniol</b>                     | 1248        | 1246        | <b>15.85 ± 0.90</b>                     | <b>29.79 ± 0.10</b> | <b>24.96 ± 0.14</b> | <b>17.12 ± 0.80</b> | <b>34.02 ± 1.12</b>   | <b>21.93 ± 1.40</b>                         | <b>15.95 ± 2.10</b> | <b>15.0 - 22.0</b> |
| 11                            | Eugenol                             | 1348        | 1351        | 0.81 ± 0.08                             | 1.12 ± 0.03         | 0.08 ± 0.01         | 0.74 ± 0.03         | 0.78 ± 0.04           | 0.79 ± 0.03                                 | 0.50 ± 0.06         | -                  |
| 12                            | Geranylacetate                      | 1352        | 1352        | 1.13 ± 0.12                             | 0.54 ± 0.03         | 1.23 ± 0.02         | 0.64 ± 0.03         | 0.85 ± 0.02           | 0.81 ± 0.07                                 | 0.82 ± 0.05         | -                  |
| 13                            | Methyl eugenol                      | 1405        | 1405        | 1.69 ± 0.09                             | 0.10 ± 0.02         | 0.02 ± 0.00         | 0.02 ± 0.00         | 0.61 ± 0.03           | 0.64 ± 0.03                                 | 0.57 ± 0.07         | -                  |
| 14                            | Heptadecane (C <sub>17</sub> )      | 1700        | 1700        | 1.96 ± 0.00                             | 2.00 ± 0.03         | 3.28 ± 0.10         | 1.10 ± 0.03         | 2.24 ± 0.03           | 2.13 ± 0.02                                 | 2.27 ± 0.04         | 1.0 - 2.5          |
| 15                            | Farnesol                            | 1712        | 1713        | 2.43 ± 0.30                             | 2.98 ± 0.92         | 1.58 ± 0.10         | 3.50 ± 0.92         | 1.95 ± 0.05           | 3.06 ± 0.05                                 | 3.79 ± 0.30         | -                  |
| 16                            | Nonadecene                          | 1880        | 1880        | 3.30 ± 0.10                             | 4.35 ± 0.14         | 1.71 ± 0.07         | 2.77 ± 0.05         | 3.00 ± 0.10           | 5.01 ± 0.12                                 | 4.10 ± 0.10         | -                  |
| 17                            | <b>Nonadecane (C<sub>19</sub>)</b>  | <b>1901</b> | <b>1901</b> | <b>11.70 ± 0.30</b>                     | <b>12.14 ± 0.05</b> | <b>17.98 ± 0.22</b> | <b>21.62 ± 1.10</b> | <b>10.90 ± 1.40</b>   | <b>13.03 ± 0.01</b>                         | <b>16.07 ± 0.90</b> | <b>8.0 - 15.0</b>  |
| 18                            | Eicosane                            | 2000        | 2000        | 1.89 ± 0.07                             | 1.01 ± 0.02         | 1.86 ± 0.07         | 1.86 ± 0.90         | 0.87 ± 0.07           | 2.27 ± 0.01                                 | 3.32 ± 0.05         | -                  |
| 19                            | <b>Heneicosane (C<sub>21</sub>)</b> | <b>2100</b> | <b>2100</b> | <b>5.02 ± 0.72</b>                      | <b>10.21 ± 0.9</b>  | <b>12.38 ± 0.22</b> | <b>8.37 ± 0.06</b>  | <b>2.95 ± 0.20</b>    | <b>5.57 ± 0.05</b>                          | <b>14.03 ± 1.10</b> | <b>3.0 - 5.5</b>   |
| 20                            | Tricosane (C <sub>23</sub> )        | 2300        | 2300        | 1.45 ± 0.03                             | 1.94 ± 0.09         | 5.01 ± 0.10         | 5.92 ± 0.20         | 1.01 ± 0.03           | 1.58 ± 0.10                                 | 5.68 ± 0.50         | -                  |
| 21                            | Pentacosane                         | 2500        | 2500        | 0.45 ± 0.02                             | 0.91 ± 0.03         | 2.08 ± 0.05         | 4.70 ± 0.92         | 0.63 ± 0.03           | 0.60 ± 0.05                                 | 2.40 ± 0.22         | -                  |
| 22                            | Heptacosane                         | 2700        | 2700        | 0.38 ± 0.03                             | 0.52 ± 0.03         | 0.77 ± 0.02         | 2.18 ± 0.08         | 0.29 ± 0.09           | 0.48 ± 0.03                                 | 1.62 ± 0.07         | -                  |
| Number of Total compounds     |                                     |             |             | 218                                     | 228                 | 222                 | 222                 | 200                   | 203                                         | 184                 |                    |
| Total identified compounds, % |                                     |             |             | 91.28                                   | 96.14               | 90.37               | 85.01               | 82.99                 | 92.81                                       | 92.21               |                    |

**Legend: The RI indices applies to a EconoCap™ EC™-5 column.**

**tr – traces <0.01 %. Data expressed as mean ± SD.**

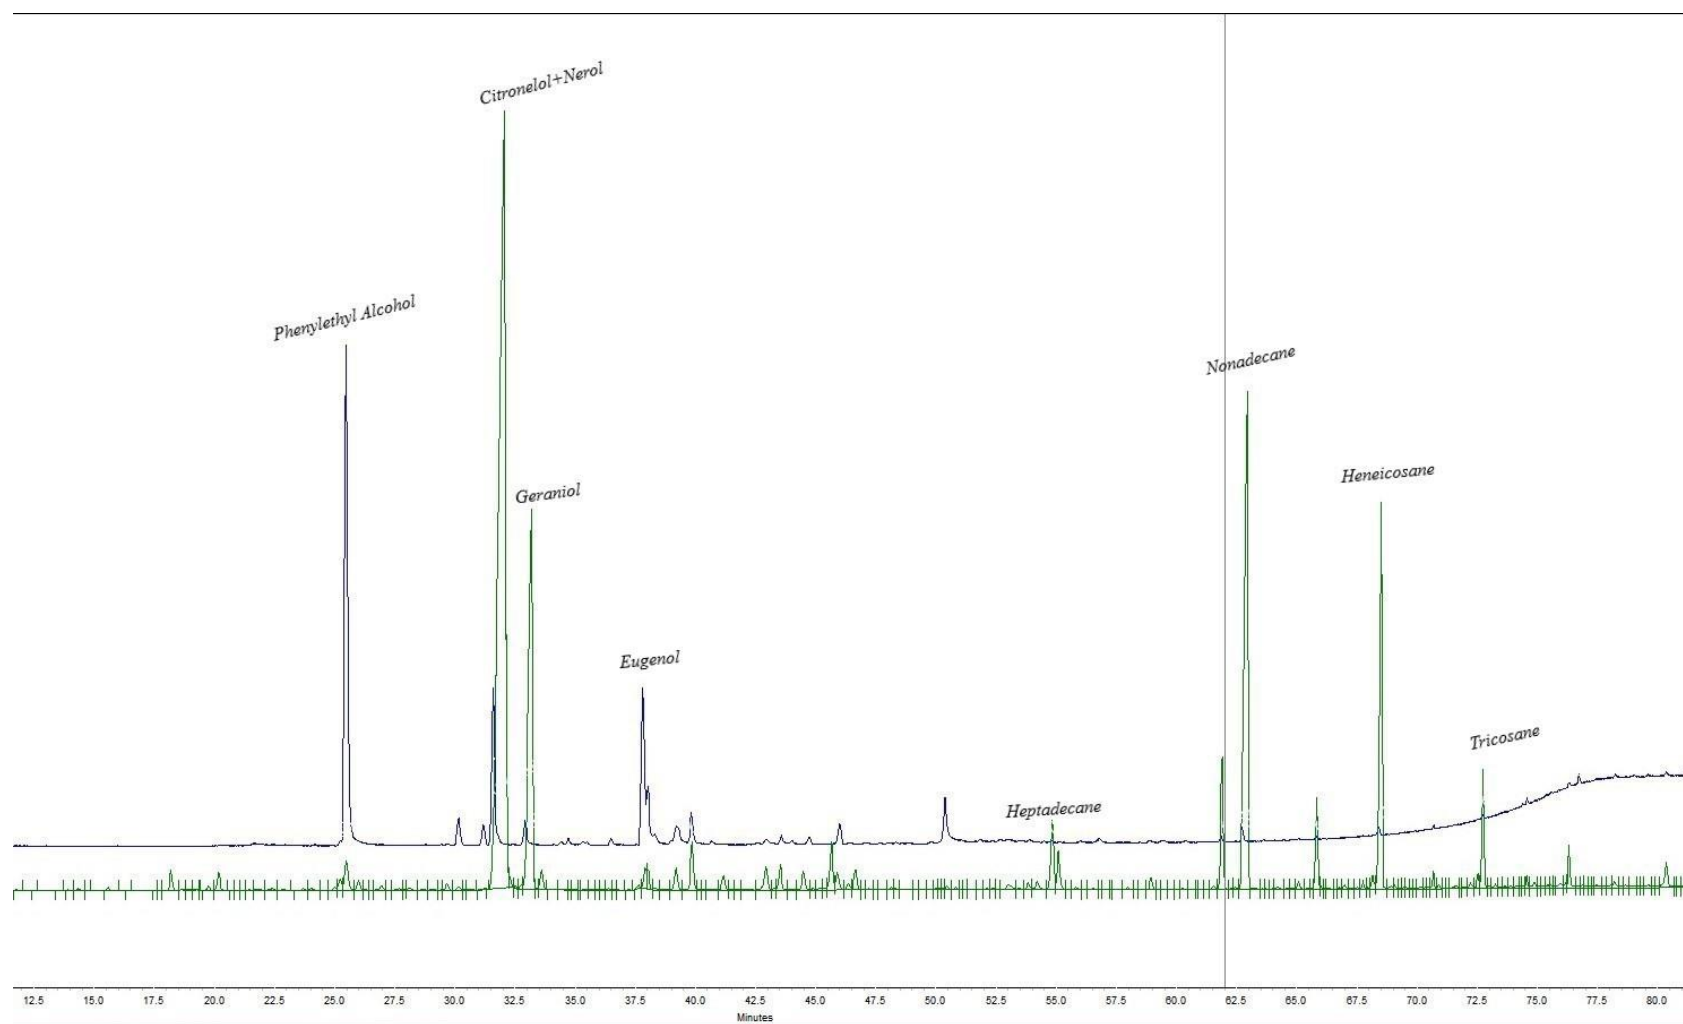

Legend: Green line – essential oil; blue line – hydrosol.

**Figure S2.** Model of the essential oil and hydrosol GC chromatograms in parallel.
